# Supplementary material for: Prevalence of Eucoleus garfiai in Wild Boars Hunted at Different Altitudes in the Campania and Latium Regions (Italy)
Source: MDPI journal article supplement (doi:10.3390/ani13040706), 2023-02-17
Supplement: s1 [file s1]

Table S1. *Eucoleus garfiai* in wild boars in Campania and Latium regions (Italy).

| Sampling Site | Sample Number | Presence of adult/egg |
|---------------|---------------|-----------------------|
| SL BN <900    | 1             | +                     |
|               | 2             | +                     |
|               | 3             | -                     |
|               | 4             | -                     |
|               | 5             | -                     |
| CF AV <900    | 6             | +                     |
|               | 7             | +                     |
|               | 8             | +                     |
|               | 9             | +                     |
|               | 10            | +                     |
|               | 11            | +                     |
|               | 12            | +                     |
|               | 13            | +                     |
|               | 14            | +                     |
|               | 15            | +                     |
|               | 16            | +                     |
|               | 17            | -                     |
|               | 18            | -                     |
|               | 19            | -                     |
|               | 20            | -                     |
|               | 21            | -                     |
|               | 22            | -                     |
|               | 23            | -                     |
|               | 24            | -                     |
|               | 25            | -                     |
|               | 26            | -                     |
|               | 27            | -                     |
|               | 28            | -                     |
|               | 29            | -                     |
|               | 30            | -                     |
|               | 31            | n.a.*                 |
| SGM SA <900   | 32            | +                     |
|               | 33            | -                     |
|               | 34            | -                     |
|               | 35            | -                     |
|               | 36            | -                     |
| Ta LT<900     | 37            | +                     |
|               | 38            | +                     |
|               | 39            | -                     |
|               | 40            | -                     |
|               | 41            | -                     |
|               | 42            | -                     |
|               | 43            | -                     |

|              |    |       |
|--------------|----|-------|
| PSL BN >900  | 44 | +     |
|              | 45 | +     |
|              | 46 | +     |
|              | 47 | +     |
|              | 48 | -     |
|              | 49 | n.a.* |
|              | 50 | n.a.* |
| NuCF AV >900 | 51 | +     |
|              | 52 | +     |
|              | 53 | +     |
|              | 54 | +     |
|              | 55 | +     |
|              | 56 | -     |
|              | 57 | -     |
| MsM SA >900  | 58 | -     |
|              | 59 | +     |
|              | 60 | +     |
|              | 61 | +     |
|              | 62 | -     |
| Ca LT >900   | 63 | -     |
|              | 64 | +     |
|              | 65 | +     |
|              | 66 | +     |
|              | 67 | +     |
|              | 68 | -     |
|              | 69 | -     |

Acronym of sampling sites, number of sample and positivity (+) or negativity (-) are reported. \*n.a. not available
